# Supplementary material for: Lower systemic inflammation is associated with gut firmicutes dominance and reduced liver injury in a novel ambulatory model of parenteral nutrition
Source: PubMed Central journal article supplement (PMC9225736; doi:10.1080/07853890.2022.2081871), 2022-06-15

# Figure S1

## LPS vs Cytokines TPN

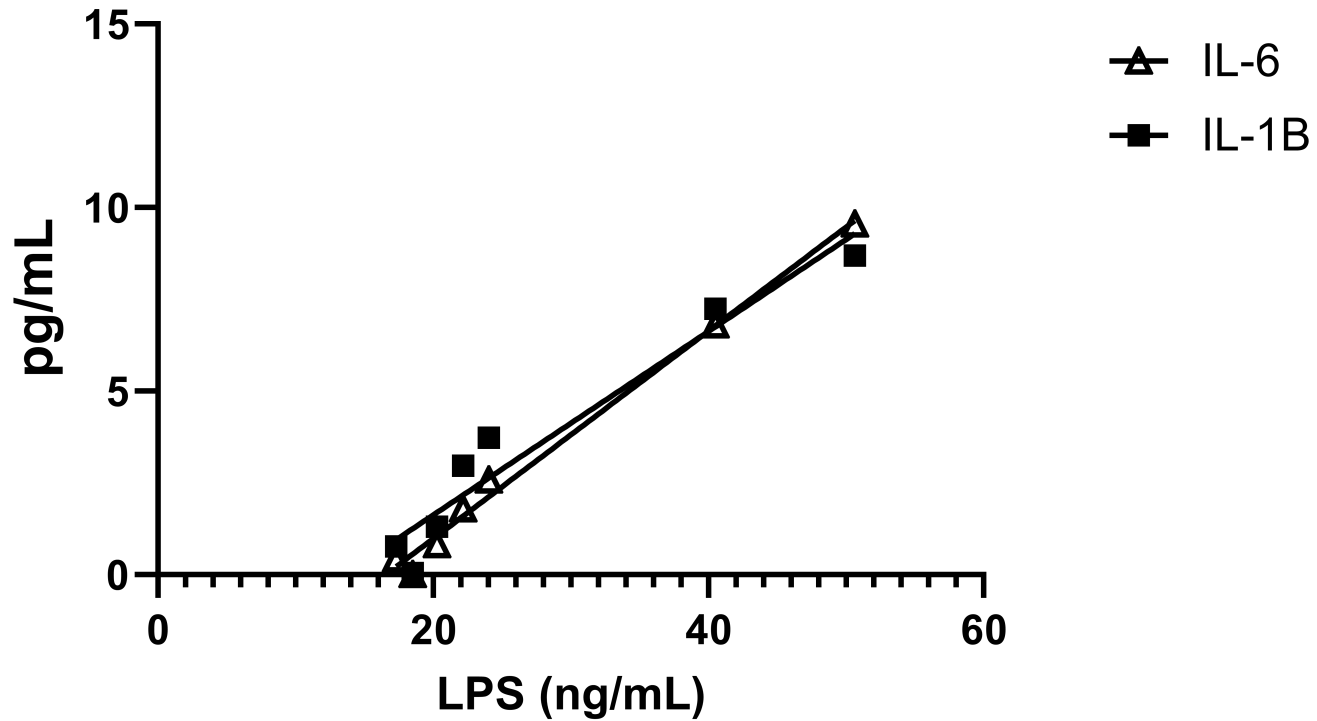

# Figure S2

## LPS vs Cytokines EN

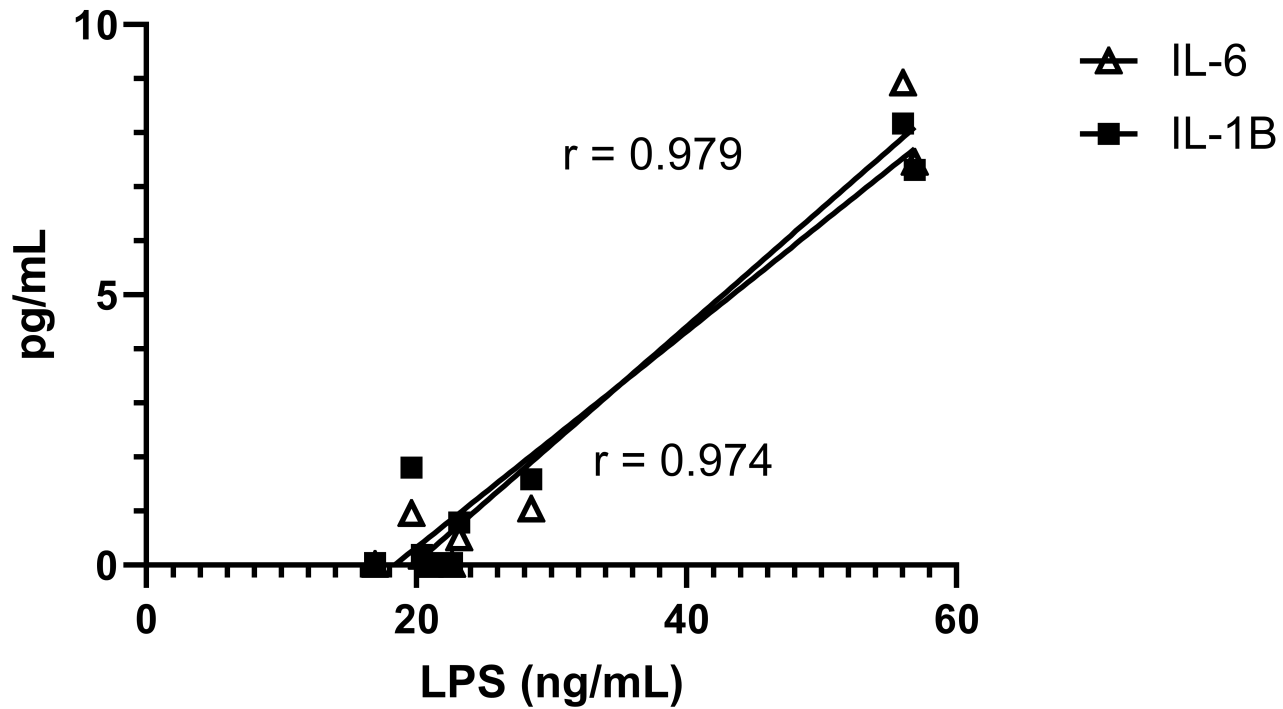

# Figure S3

Final weight vs Inflammation Markers TPN

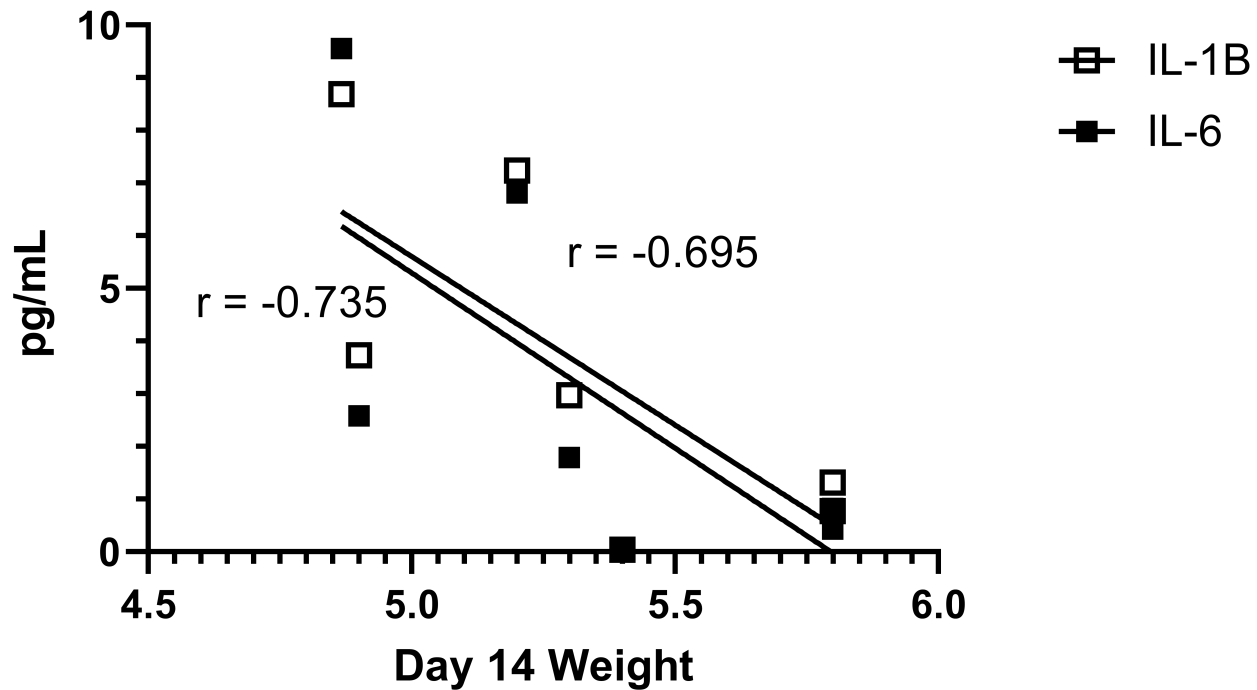

# Figure S4

## Final weight vs Inflammation Marker EN

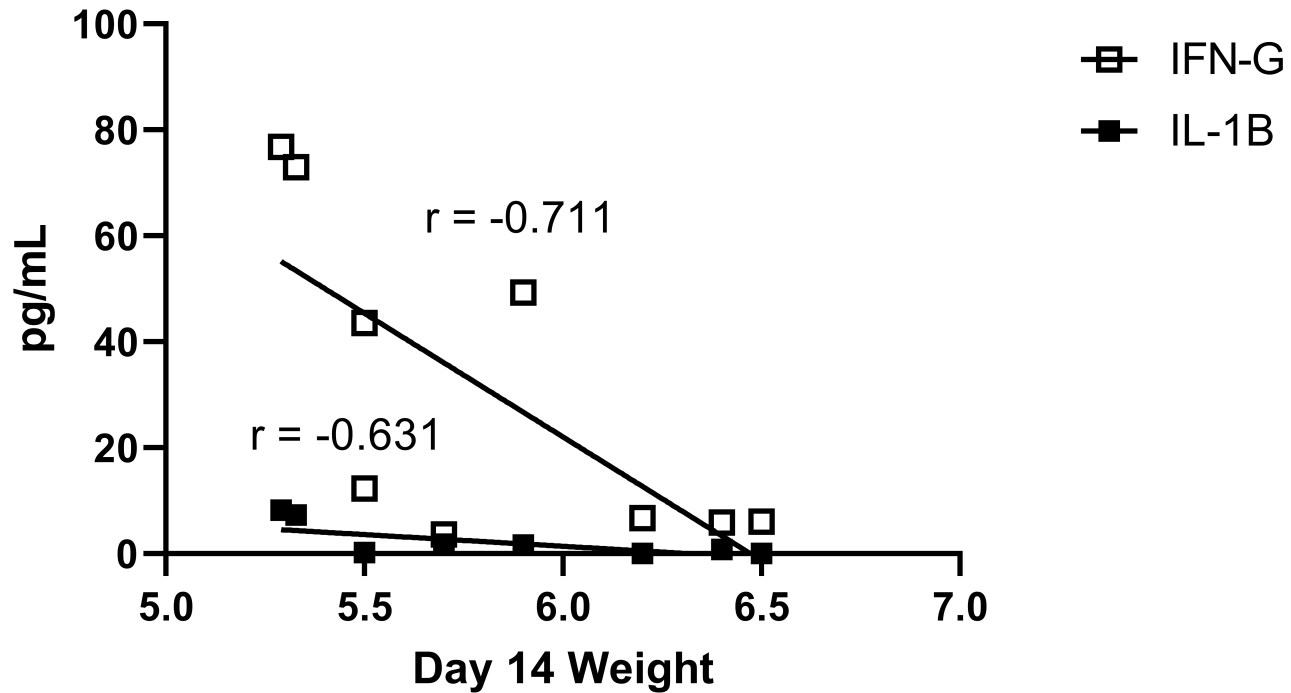

# Figure S5

## Lipid Panel by LPS

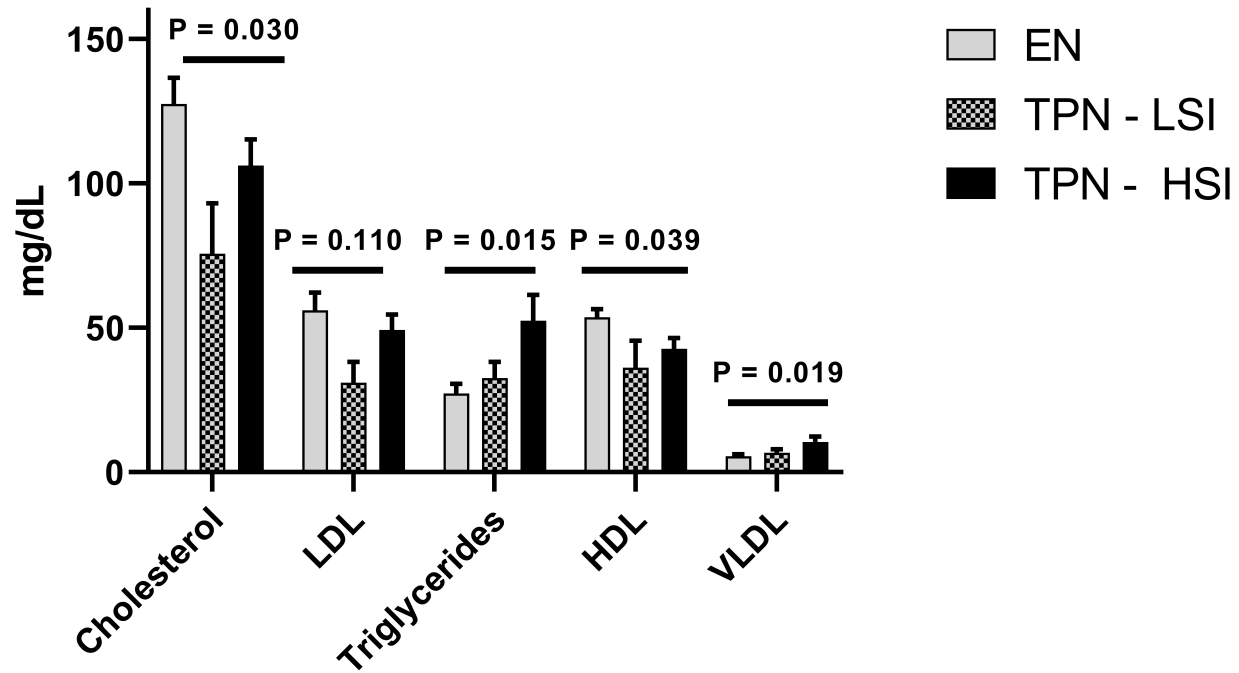

# Figure S6

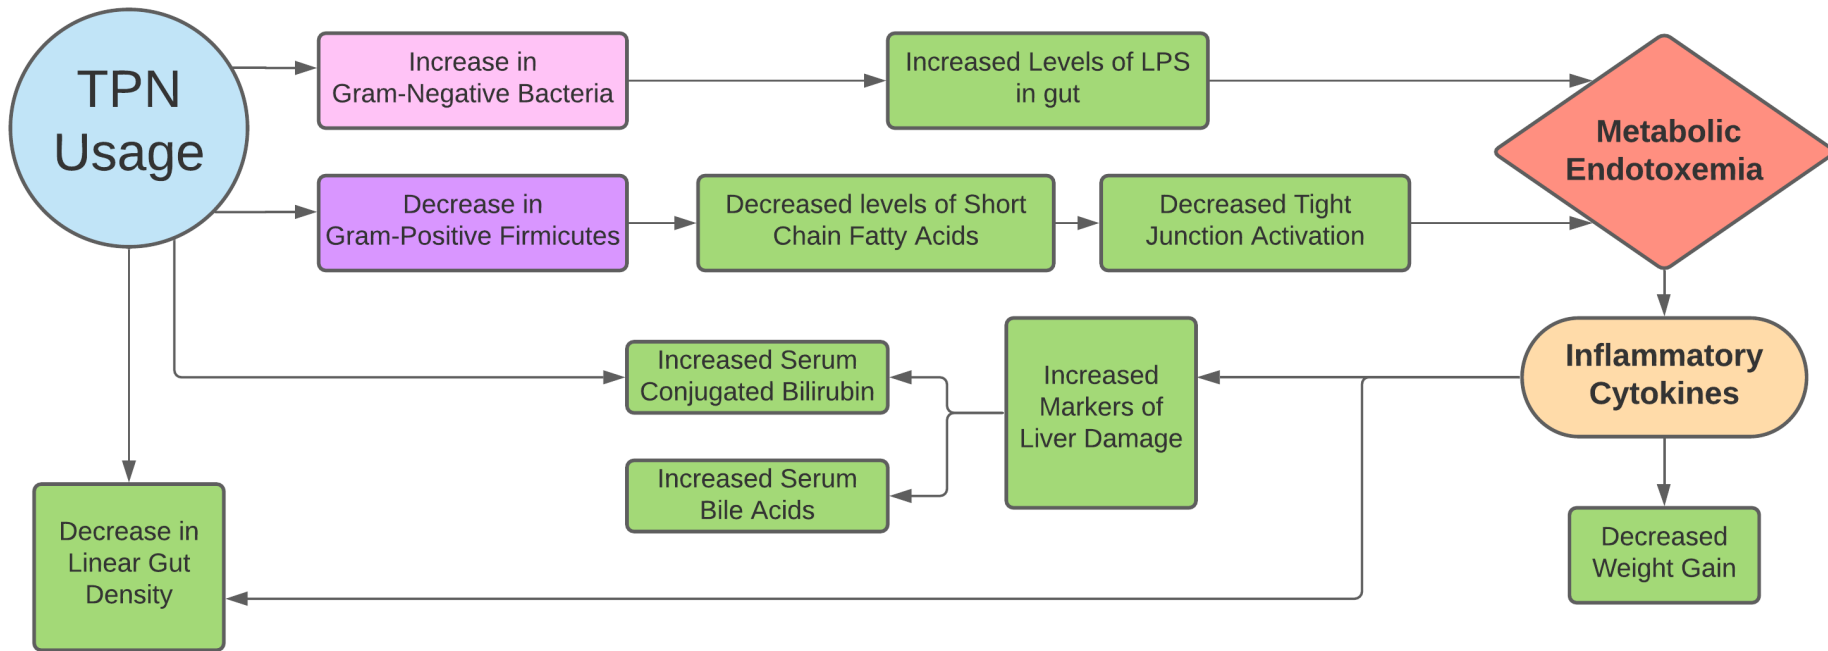

Supplement: IANN_A_2081871_SM5142.pdf [file IANN_A_2081871_SM5142.pdf]
